# Supplementary material
Source: PubMed Central journal article supplement (PMC4272718)
Supplement: AEM.02503-14_zam999105889so1.pdf [file AEM.02503-14_zam999105889so1.pdf]

**Supplemental Figure S1. Fur box sequence upstream of *iucA*.** Virtual footprint analysis of the *P. stewartii* Fur binding sequence. Letters represent position weight matrix based on *E. coli* K-12 consensus sequence for Fur binding. The Y-axis represents relative nucleotide probability and the X-axis represents nucleotide position. *P. stewartii* Fur box sequence is located at -80bp of *iucA* and has a probability score of 2.21 (max score = 2.45).

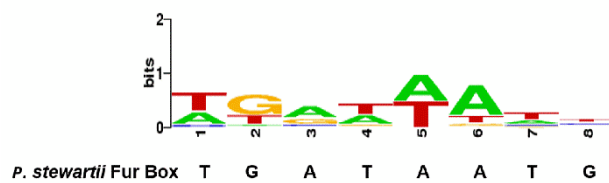

**Supplemental Figure S2. *Δfur* overproduces siderophores on CAS medium.** Production of siderophores was detected using colorimetric CAS agar plates (1). For each strain, inoculum was taken from a single colony grown on nutrient agar and streaked down the middle of the CAS plates and incubated for ten days at 28°C. The zone of color change was photographed for representative plates.

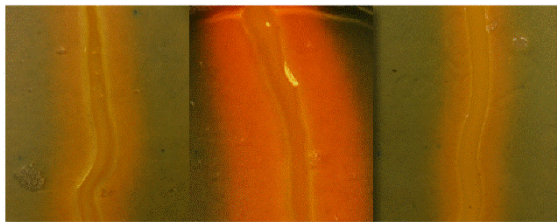

**DC283**

***Δfur***

***Δfur/fur+***

#### **LITERATURE CITED**

1. **Louden BC, Haarmann D, Lynne A.** 2011. Use of blue agar CAS assay for siderophore detection. *J. Microbiol. Biol. Educ.* **12:51-53.**
